# Supplementary material
Source: Frontiers journal article supplement (https://www.frontiersin.org/articles/268035)
Supplement: Data_Sheet_1.pdf [file Data_Sheet_1.pdf]

|               |               |             |       |                 |              |                        |                      |
|---------------|---------------|-------------|-------|-----------------|--------------|------------------------|----------------------|
| Sample Name   | 2             | Position    | P1-D7 | Instrument Name | Instrument 1 | User Name              |                      |
| Inj Vol       |               | InjPosition |       | SampleType      | Sample       | IRM Calibration Status | Success              |
| Data Filename | XZL-QCZSG-p.d | ACQ Method  |       | Comment         |              | Acquired Time          | 9/15/2014 8:16:45 PM |

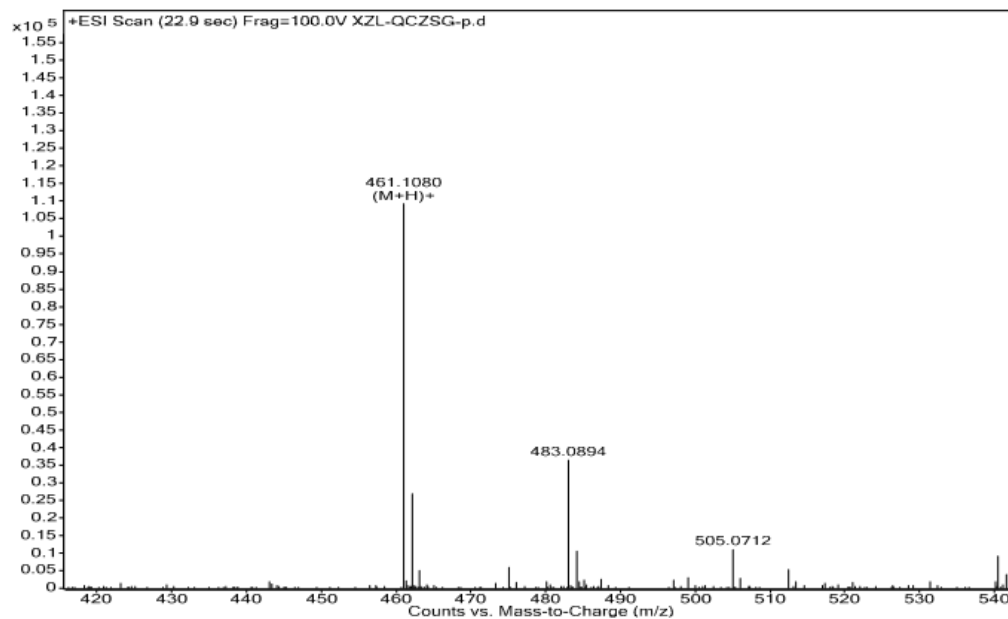

MS Formula Results: + Scan (22.9 sec) (XZL-QCZSG-p.d)

| m/z     | Ion                | Formula     | Abundance |
|---------|--------------------|-------------|-----------|
| 461.108 | (M+H) <sup>+</sup> | C22 H21 O11 | 109079.3  |

  

| Best                                | Formula (M)    | Ion Formula    | Calc. m/z | Score | Cross Score | Mass     | Calc. Mass | Diff (ppm) | Abn. Diff (ppm) | Abund. Match | Spacing Match | Mass Match | m/z     | DBE |
|-------------------------------------|----------------|----------------|-----------|-------|-------------|----------|------------|------------|-----------------|--------------|---------------|------------|---------|-----|
| <input checked="" type="checkbox"/> | C22 H20 O11    | C22 H21 O11    | 461.1078  | 99.35 |             | 460.1007 | 460.1006   | -0.3       | 0.3             | 99.58        | 97.97         | 99.91      | 461.108 | 13  |
| <input type="checkbox"/>            | C23 H16 N4 O7  | C23 H17 N4 O7  | 461.1092  | 94.98 |             | 460.1007 | 460.1019   | 2.6        | 2.6             | 97.03        | 95.65         | 93.41      | 461.108 | 18  |
| <input type="checkbox"/>            | C19 H12 N10 O5 | C19 H13 N10 O5 | 461.1065  | 92.55 |             | 460.1007 | 460.0992   | -3.26      | 3.26            | 99.5         | 88.59         | 89.86      | 461.108 | 19  |

## Supplementary Fig S1. HRMS Analysis

HRMS (ESI): m/z, calculated for C<sub>22</sub>H<sub>20</sub>O<sub>11</sub>, 461.1078 (M + H)<sup>+</sup>, found 461.1080.

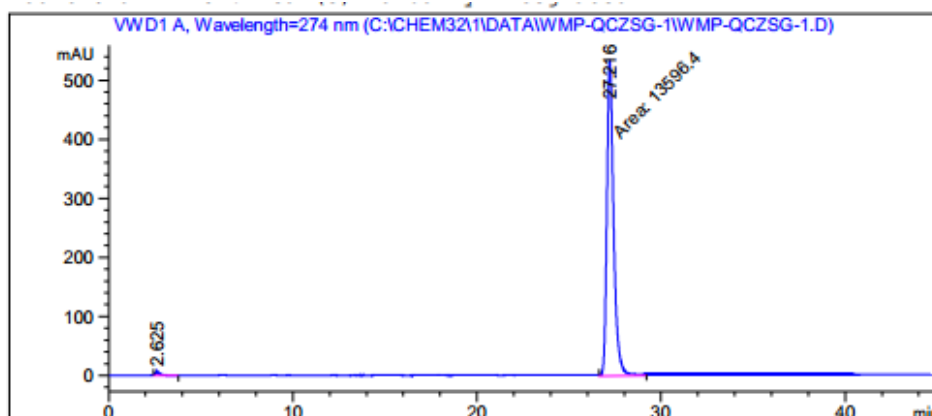

=====  
 Area Percent Report  
 =====

Sorted By : Retention Time  
 Multiplier: : 1.0000  
 Dilution: : 1.0000  
 Sample Amount: : 1.00000 [Mg/ML] (not used in calc.)  
 Use Multiplier & Dilution Factor with ISTDs

Signal 1: VWD1 A, Wavelength=274 nm

| Peak # | RetTime [min] | Sig | Type | Area [mAU*s] | Height [mAU] | Area %  |
|--------|---------------|-----|------|--------------|--------------|---------|
| 1      | 2.625         | 1   | VB   | 99.85452     | 7.95564      | 0.7291  |
| 2      | 27.216        | 1   | MM   | 1.35964e4    | 533.74548    | 99.2709 |

**Supplemental Fig. S2 HPLC Analysis**

HPCL Purity>99.0 %

The purity (> 99.0%) of final compounds is verified by the HPLC study performed on Agilent C18 (4.6 mm×150 mm, 3.5 µm) column using a mixture of solvent methanol/water at the flow rate of 1.0 mL/min and peak detection at 274 nm under UV.

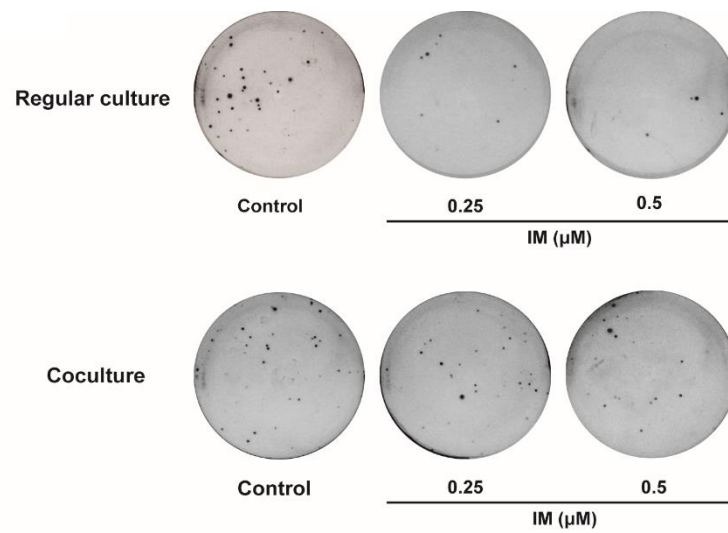

**Supplemental Fig. S3A** Soft agar colony formation experiment was performed to ascertain the IM inhibition effect.

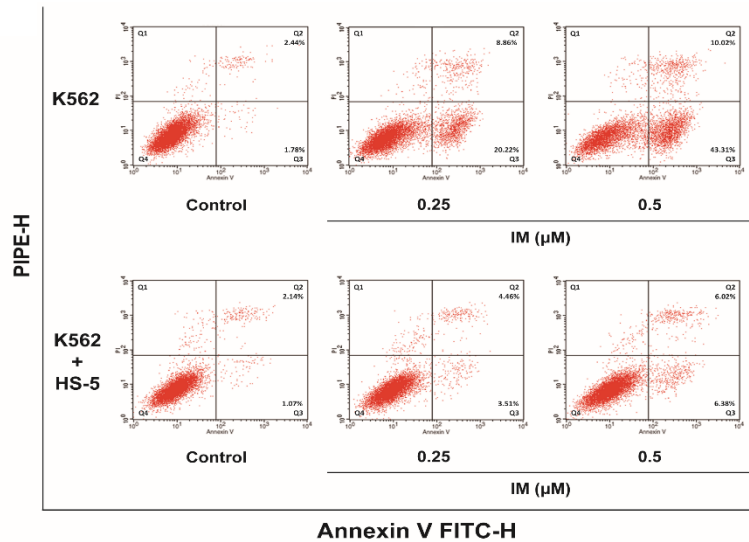

**Supplemental Fig. S3B** Annexin V/PI double-staining assay of the toxicity of IM in coculture or not analyzed by flow cytometry.

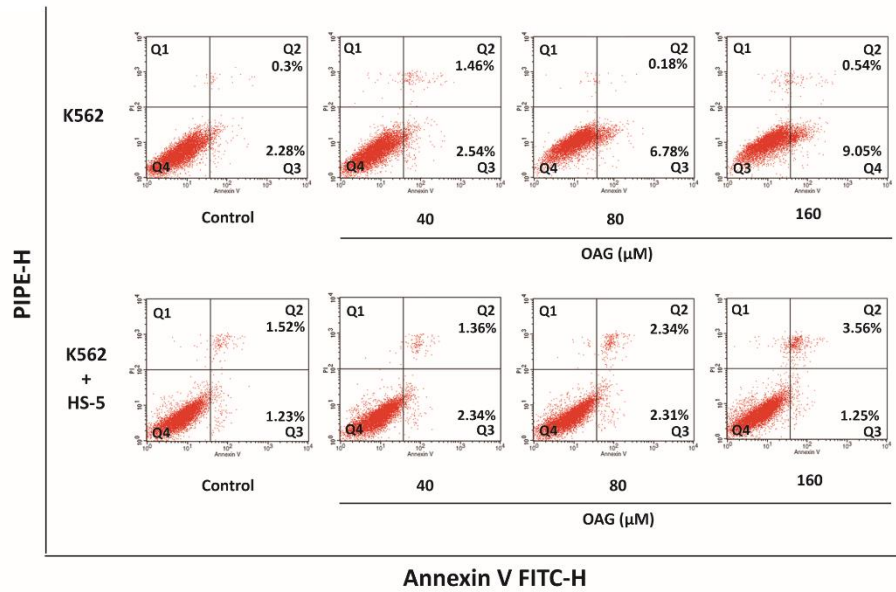

**Supplemental Fig. S4A** AnnexinV/PI double-staining assay of the intrinsic toxicity of OAG (40, 80, and 160μM) was analyzed by flow cytometry.

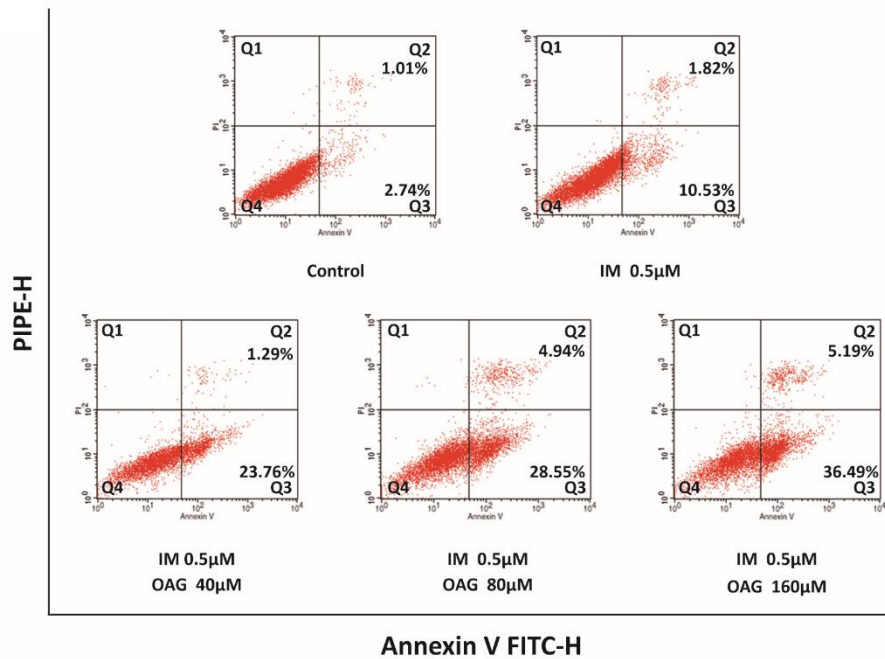

**Supplemental Fig. S4B** AnnexinV/PI double-staining assay of the toxicity of OAG (40, 80, and 160μM) and/or IM (0.5μM) was analyzed by flow cytometry.

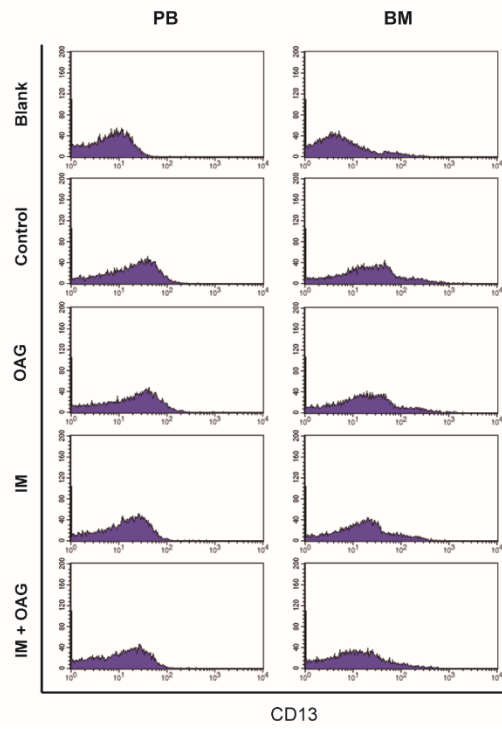

**Supplemental Fig. S5** The expression of CD13 in PB and BM samples from tree mice of each group.
